# Supplementary material for: Puf Mediates Translation Repression of Transmission-Blocking Vaccine Candidates in Malaria Parasites
Source: PLOS journal article supplement (doi:10.1371/journal.ppat.1003268), 2013-04-18
Supplement: S2 (10.1371/journal.ppat.1003268.s002) [file journal.ppat.1003268.s002]

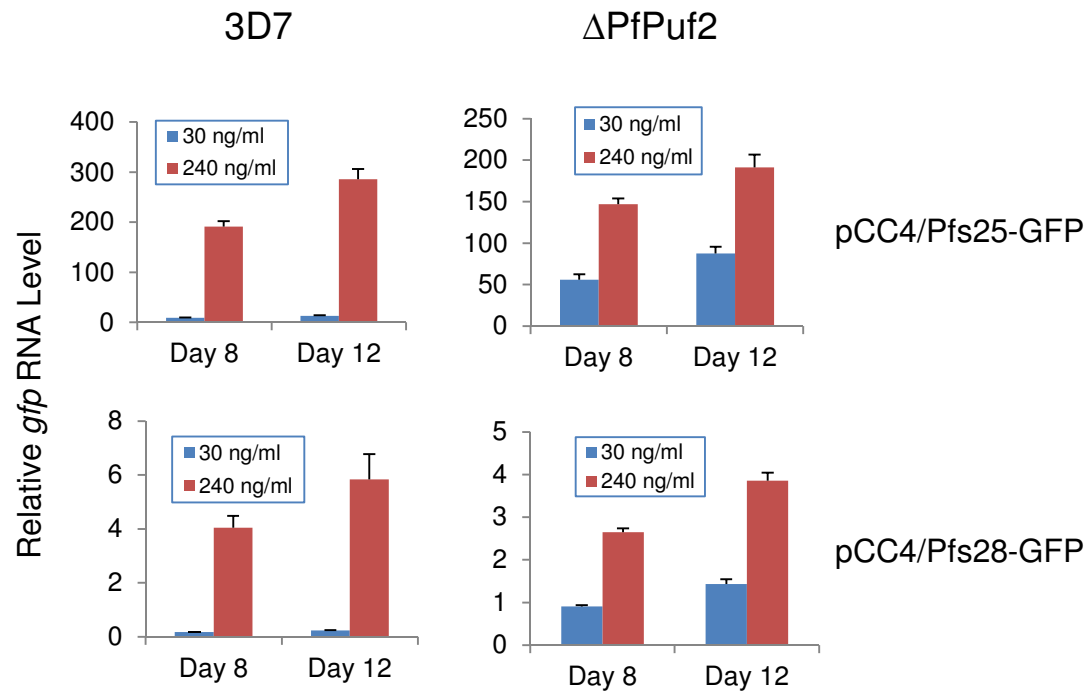

**Figure S2. Transcription of *gfp* in wild-type 3D7 and  $\Delta$ Puf2 lines.** These lines were transfected with the GFP expression cassette under the control of *pfs25* or *pfs28* FRs. Gametocytes at stage III (day 8) and stage V (day 12) were harvested for RNA purification. The relative GFP RNA levels were measured by real-time RT-PCR using *PF07\_0073* as a reference. RNA levels were significantly increased when the drug pressure was elevated to 240 ng/ml of blasticidin ( $P < 0.001$ ,  $t$ -test).
